# Supplementary material
Source: MDPI journal article supplement (https://www.mdpi.com/2075-163X/10/3/268)
Supplement: s1 [file s1]

**Table S1.** Composition of oxide (wt%) for selected clinoptilolite crystals by EDS.

| CAMP                                             | F2        | F2        | F1a       | F1b       | P1        | P1        | P1        | P1        | P2        | P2        | P3        | P3        | P4        |
|--------------------------------------------------|-----------|-----------|-----------|-----------|-----------|-----------|-----------|-----------|-----------|-----------|-----------|-----------|-----------|
|                                                  | c         | c         | s         | s         | s         | s         | m         | m         | s         | m         | s         | c         | c         |
| oxide                                            |           |           |           |           |           |           |           |           |           |           |           |           |           |
| SiO <sub>2</sub>                                 | 68.16(50) | 67.49(32) | 66.24(20) | 66.47(25) | 69.01(62) | 70.65(55) | 68.76(42) | 67.78(40) | 69.49(41) | 68.19(42) | 68.20(47) | 67.32(50) | 67.47(25) |
| Al <sub>2</sub> O <sub>3</sub>                   | 11.89(20) | 12.04(25) | 11.96(21) | 11.48(12) | 12.40(31) | 12.61(30) | 11.98(21) | 12.01(22) | 12.20(25) | 11.25(29) | 12.29(30) | 11.88(25) | 11.70(32) |
| <sup>a</sup> Fe <sub>2</sub> O <sub>3</sub>      | -         | 0.05(3)   | 0.15(6)   | -         | -         | -         | -         | -         | 0.31(7)   | 1.10 (10) | 1.14(5)   | 1.99(3)   | 0.62(10)  |
| MgO                                              | 1.12(5)   | 1.22(9)   | 0.25 (12) | 0.19(6)   | 1.57(5)   | 1.45(9)   | 1.36(7)   | 1.53(6)   | 1.23(18)  | 1.07 (20) | 1.39(3)   | 1.06(5)   | 0.63(9)   |
| CaO                                              | 3.43(12)  | 3.41(17)  | 3.29(13)  | 3.25(10)  | 3.21(9)   | 3.22(14)  | 3.34 (8)  | 3.34(7)   | 3.07(10)  | 3.31      | 3.41(20)  | 3.55 (11) | 3.41(15)  |
| Na <sub>2</sub> O                                | 1.44(7)   | 0.91(6)   | 2.99(4)   | 2.27(8)   | 0.80(10)  | 0.86(30)  | 0.69(17)  | 0.52(19)  | 1.10(20)  | 0.85(8)   | 1.12(17)  | 0.81(17)  | 1.39(16)  |
| K <sub>2</sub> O                                 | 0.58 (13) | 1.06(16)  | 0.76(9)   | 0.78(11)  | 0.57(10)  | 0.84(21)  | 0.69(17)  | 0.52(8)   | 1.11(10)  | 1.12(7)   | 0.98(19)  | 0.91 (13) | 0.87(8)   |
| Tot.                                             | 86.62     | 86.18     | 85.64     | 84.44     | 87.56     | 89.64     | 86.70     | 85.84     | 88.35     | 86.35     | 88.53     | 87.52     | 86.09     |
| Number of cations on the basis of 72 framework O |           |           |           |           |           |           |           |           |           |           |           |           |           |
| Si                                               | 29.84     | 29.75     | 29.61     | 29.97     | 29.77     | 29.82     | 29.95     | 29.82     | 29.84     | 29.79     | 29.49     | 29.54     | 29.87     |
| Al                                               | 6.14      | 6.26      | 6.30      | 6.10      | 6.31      | 6.27      | 6.15      | 6.23      | 6.17      | 6.04      | 6.26      | 6.14      | 6.11      |
| Fe <sup>3+</sup>                                 | -         | 0.17      | 0.05      | -         | -         | --        | -         | -         | 0.11      | 0.41      | 0.41      | 0.73      | 0.23      |
| Mg                                               | 0.73      | 0.80      | 0.17      | 0.13      | 1.01      | 0.91      | 0.88      | 0.10      | 0.79      | 0.71      | 0.90      | 0.69      | 0.42      |
| Ca                                               | 1.60      | 1.60      | 1.57      | 1.56      | 1.47      | 1.44      | 1.54      | 1.55      | 1.41      | 1.56      | 1.57      | 1.66      | 1.61      |
| Na                                               | 1.22      | 0.78      | 2.59      | 1.98      | 0.67      | 0.70      | 0.48      | 1.56      | 0.92      | 0.74      | 0.94      | 0.69      | 1.19      |
| K                                                | 0.32      | 0.60      | 0.43      | 0.45      | 0.32      | 0.45      | 0.38      | 0.29      | 0.61      | 0.64      | 0.54      | 0.51      | 0.49      |
| T                                                | 35.98     | 36.18     | 36.03     | 35.99     | 36.08     | 36.06     | 36.01     | 36.05     | 36.12     | 36.24     | 36.16     | 36.41     | 36.3      |
| Si/Al                                            | 4.86      | 4.76      | 4.70      | 4.91      | 4.72      | 4.75      | 4.87      | 4.78      | 4.83      | 4.93      | 5.01      | 4.99      | 5.02      |
| TE%                                              | -1.25     | 1.29      | -2.26     | 4.69      | 5.48      | 6.22      | 6.76      | 3.63      | 4.16      | 2.22      | -2.45     | 3.83      | 6.03      |
| CAMP                                             | E1c       | E1d       | E1d       | E1d       | E1d       | N2        | N2        | N2        | N2        | N3        |           |           |           |
|                                                  | c         | c         | c         | c         | c         | s         | s         | m         | m         |           |           |           |           |
| oxide                                            |           |           |           |           |           |           |           |           |           |           |           |           |           |
| SiO <sub>2</sub>                                 | 67.80(35) | 66.23(52) | 67.52(30) | 69.80(55) | 69.97(42) | 69.35(55) | 70.15(30) | 67.61(32) |           |           |           |           |           |
| Al <sub>2</sub> O <sub>3</sub>                   | 11.90(18) | 12.29(31) | 12.35(21) | 11.96(32) | 13.02(25) | 13.29(22) | 12.98(19) | 12.47(22) |           |           |           |           |           |
| <sup>a</sup> Fe <sub>2</sub> O <sub>3</sub>      | -         | 0.15(2)   | 0.15(8)   | 0.19(5)   | 0.12(2)   | 0.19(2)   | 0.26(3)   | 0.21(2)   |           |           |           |           |           |
| MgO                                              | 1.41(3)   | 1.44(6)   | 1.41 (11) | 1.43(6)   | 1.62(5)   | 1.68(9)   | 1.16(7)   | 1.65(5)   |           |           |           |           |           |
| CaO                                              | 3.16(11)  | 3.26(12)  | 3.31(11)  | 3.36(12)  | 3.67(15)  | 3.67(15)  | 4.34 (18) | 3.51(7)   |           |           |           |           |           |

|                                                         |          |          |         |          |          |          |          |          |
|---------------------------------------------------------|----------|----------|---------|----------|----------|----------|----------|----------|
| <b>Na<sub>2</sub>O</b>                                  | 0.74(7)  | 0.75(5)  | 0.92(3) | 0.66(7)  | 0.63(9)  | 0.75(15) | 0.76(17) | 0.79(10) |
| <b>K<sub>2</sub>O</b>                                   | 0.68 (9) | 0.57(12) | 0.67(9) | 0.55(13) | 0.55(10) | 0.51(11) | 0.46(10) | 0.28(5)  |
| <b>Tot.</b>                                             | 85.69    | 84.69    | 86.33   | 87.95    | 89.58    | 89.44    | 90.10    | 86.52    |
| <i>Number of cations on the basis of 72 framework O</i> |          |          |         |          |          |          |          |          |
| <b>Si</b>                                               | 29.78    | 29.76    | 29.64   | 29.98    | 29.57    | 29.39    | 29.55    | 29.56    |
| <b>Al</b>                                               | 6.32     | 6.32     | 6.39    | 6.05     | 6.49     | 6.64     | 6.44     | 6.43     |
| <b>Fe<sup>3+</sup></b>                                  | 0.03     | 0.05     | 0.05    | 0.06     | 0.04     | 0.06     | 0.08     | 0.07     |
| <b>Mg</b>                                               | 0.92     | 0.94     | 0.92    | 0.91     | 1.02     | 1.06     | 0.73     | 1.08     |
| <b>Ca</b>                                               | 1.48     | 1.52     | 1.55    | 1.52     | 1.66     | 1.66     | 1.95     | 1.63     |
| <b>Na</b>                                               | 0.63     | 0.78     | 0.55    | 1.98     | 0.51     | 0.62     | 0.61     | 0.67     |
| <b>K</b>                                                | 0.32     | 0.38     | 0.30    | 0.45     | 0.29     | 0.28     | 0.24     | 0.16     |
| <b>T</b>                                                | 36.01    | 36.13    | 36.08   | 36.09    | 36.10    | 36.09    | 36.07    | 36.06    |
| <b>Si/Al</b>                                            | 4.83     | 4.76     | 4.70    | 4.91     | 4.55     | 4.43     | 4.58     | 4.76     |
| <b><sup>γ</sup>E%</b>                                   | 6.05     | 7.95     | 5.28    | 6.39     | 5.54     | 5.38     | 4.56     | 0.16     |

Notes: The data are the mean of then point analyses, standard deviations are given in parentheses. "s" is shards, and "c" is cavities and "m" is matrix. <sup>α</sup> Total Fe as Fe<sub>2</sub>O<sub>3</sub>; <sup>β</sup> water was calculated by difference; <sup>γ</sup> E(%) by [69].
