# Supplementary material
Source: MDPI journal article supplement (https://www.mdpi.com/2075-163X/10/3/268)
Supplement: s1 [file s1]

**Table S2.** Composition of oxide (wt%) for selected mordenite crystals, obtained by EDS analyses.

| CAMP                                                    | H1        | H1         | H1         | H2         | H2         | H2        | H3        | H3        | H3        | H3        | F2        | F2        | F2        | F2        | F3        | F3        | F3        | F3        | I1        | I1        |
|---------------------------------------------------------|-----------|------------|------------|------------|------------|-----------|-----------|-----------|-----------|-----------|-----------|-----------|-----------|-----------|-----------|-----------|-----------|-----------|-----------|-----------|
|                                                         | m         | c          | c          | s          | c          | c         | c         | c         | c         | m         | c         | c         | s         | s         | c         | c         | s         | s         | s         | c         |
| <i>Oxide</i>                                            |           |            |            |            |            |           |           |           |           |           |           |           |           |           |           |           |           |           |           |           |
| SiO <sub>2</sub>                                        | 69.79(39) | 68.12(30)  | 69.41 (28) | 67.83(70)  | 67.89(62)  | 68.75(25) | 68.42(32) | 68.24(40) | 67.73(41) | 68.19(42) | 69.50(47) | 69.11(50) | 68.59(25) | 70.10(30) | 66.14(41) | 66.02(40) | 66.15(43) | 66.96(36) | 70.06(40) | 72.11(35) |
| Al <sub>2</sub> O <sub>3</sub>                          | 11.89(19) | 11.67(22)  | 11.61(25)  | 11.19(30)  | 11.30(31)  | 10.99(20) | 10.94(21) | 10.93(22) | 11.12(25) | 11.25(27) | 11.75(30) | 11.73(32) | 11.59(32) | 10.07(27) | 11.45(15) | 11.15(30) | 10.97(12) | 11.11(17) | 10.96(31) | 11.31(31) |
| <sup>a</sup> Fe <sub>2</sub> O <sub>3</sub>             | 0.07(7)   | 0.08(6)    | -          | 0.17(5)    | 0.33(10)   | 0.39(10)  | 0.28(7)   | 0.22(5)   | 0.42(5)   | 0.02(5)   | 0.13(5)   | 0.03(3)   | -         | -         | -         | -         | -         | -         | 1.01(2)   | 0.06(5)   |
| MgO                                                     | 0.08(6)   | 0.11(8)    | 0.21(8)    | 0.18(12)   | 0.08(5)    | 0.18(9)   | 0.36(7)   | 0.35(6)   | 0.34(7)   | 0.36 (10) | 0.50(3)   | 0.62(5)   | 0.65(9)   | 0.62(11)  | 0.51 (11) | 0.28(21)  | 0.28(15)  | 0.40(7)   | 0.43(10)  | 0.15(7)   |
| CaO                                                     | 2.82(10)  | 2.89(12)   | 2.73(9)    | 3.05(8)    | 2.91(9)    | 2.90(15)  | 2.99 (8)  | 2.90(7)   | 3.04(15)  | 3.06(20)  | 3.43(20)  | 3.28(11)  | 3.08(15)  | 2.76(15)  | 2.97(15)  | 2.85(23)  | 2.90(21)  | 3.03(11)  | 2.87(16)  | 2.67(15)  |
| Na <sub>2</sub> O                                       | 2.84(9)   | 2.85(15)   | 3.37(12)   | 2.66(2)    | 2.38(10)   | 2.62(30)  | 1.57(17)  | 1.66(19)  | 1.58(10)  | 1.57(21)  | 2.20(17)  | 1.89(17)  | 1.87(16)  | 1.57(13)  | 1.73(9)   | 1.81(1)   | 1.77(3)   | 1.79(5)   | 1.14 (6)  | 1.17(6)   |
| K <sub>2</sub> O                                        | 1.12(5)   | 1.04(5)    | 1.09(12)   | 1.44(10)   | 1.42(12)   | 1.36(21)  | 1.54(10)  | 1.73(9)   | 1.95(20)  | 1.64(8)   | 0.73(19)  | 0.74(13)  | 0.93(8)   | 1.02(8)   | 1.59(7)   | 1.46(10)  | 1.40(11)  | 1.63(8)   | 2.33(2)   | 3.29(8)   |
| Tot.                                                    | 88.60     | 86.76      | 88.42      | 86.52      | 86.33      | 87.19     | 86.10     | 86.05     | 86.19     | 86.10     | 87.93     | 87.38     | 86.71     | 86.14     | 84.39     | 83.57     | 83.47     | 84.92     | 88.80     | 90.77     |
| <i>Number of cations on the basis of 96 framework O</i> |           |            |            |            |            |           |           |           |           |           |           |           |           |           |           |           |           |           |           |           |
| Si                                                      | 40.05     | 39.96      | 40.01      | 40.03      | 40.09      | 40.21     | 40.36     | 40.34     | 40.10     | 40.24     | 40.04     | 40.03     | 40.14     | 40.78     | 39.68     | 40.08     | 40.20     | 40.13     | 40.36     | 40.58     |
| Al                                                      | 8.04      | 8.07       | 7.89       | 7.78       | 7.86       | 7.56      | 7.58      | 7.61      | 7.76      | 7.82      | 7.97      | 7.99      | 7.99      | 7.33      | 8.09      | 7.98      | 7.86      | 7.85      | 7.43      | 7.50      |
| Fe <sup>3+</sup>                                        | 0.03      | 0.03       | -          | 0.08       | 0.15       | 0.17      | 0.12      | 0.10      | 0.19      | 0.07      | 0.6       | 0.01      | -         | -         | -         | -         | -         | -         | 0.49      | 0.03      |
| Mg                                                      | 0.07      | 0.09       | 0.18       | 0.16       | 0.07       | 0.16      | 0.32      | 0.31      | 0.30      | 0.31      | 0.43      | 0.53      | 0.57      | 0.54      | 0.46      | 0.25      | 0.25      | 0.36      | 0.37      | 0.13      |
| Ca                                                      | 1.72      | 1.81       | 1.68       | 1.92       | 1.83       | 1.81      | 1.87      | 1.83      | 1.92      | 1.93      | 2.11      | 2.02      | 1.92      | 1.71      | 1.90      | 1.84      | 1.88      | 1.94      | 1.76      | 1.60      |
| Na                                                      | 3.15      | 3.24       | 3.77       | 3.04       | 2.72       | 2.96      | 1.79      | 1.91      | 1.82      | 1.80      | 2.11      | 2.09      | 1.78      | 1.59      | 2.01      | 2.14      | 2.08      | 2.08      | 1.27      | 1.28      |
| K                                                       | 0.82      | 0.78       | 0.80       | 1.08       | 1.07       | 1.01      | 1.15      | 1.30      | 1.47      | 1.24      | 0.54      | 0.55      | 0.69      | 0.76      | 1.22      | 1.13      | 1.08      | 1.25      | 1.71      | 2.36      |
| ΣT                                                      | 48.12     | 48.06      | 47.90      | 47.89      | 48.10      | 47.94     | 48.06     | 48.05     | 48.05     | 48.04     | 48.12     | 48.06     | 48.11     | 48.08     | 47.77     | 48.06     | 48.06     | 47.98     | 48.27     | 48.11     |
| Si/Al                                                   | 4.98      | 4.95       | 5.07       | 5.14       | 5.09       | 5.30      | 5.30      | 5.29      | 5.16      | 5.14      | 5.01      | 4.99      | 5.02      | 5.55      | 4.90      | 5.02      | 5.12      | 5.11      | 5.42      | 5.41      |
| TE%                                                     | 6.17      | 3.39       | -5.05      | -5.41      | 5.01       | -2.20     | 4.91      | 2.96      | 2.74      | 3.94      | 3.89      | 3.12      | 3.01      | 6.05      | 4.51      | 6.55      | 5.39      | -0.86     | 2.65      | 5.43      |
| CAMP                                                    | I2        | I2         | I2         | I2         | I2         | I2        | E1a       | E1a       | E1b       | E1b       | N1        | N3        | N3        | N4        | N4        | M2        | M2        | M3        | M3        |           |
|                                                         | s         | s          | s          | c          | c          | c         | c         | c         | m         | c         | s         | s         | s         | c         | s         | c         | c         | s         | s         |           |
| <i>Oxide</i>                                            |           |            |            |            |            |           |           |           |           |           |           |           |           |           |           |           |           |           |           |           |
| SiO <sub>2</sub>                                        | 68.54(33) | 68.91 (37) | 68.81(30)  | 69.32(30)  | 69.35(40)  | 69.16(40) | 66.85(32) | 67.33(40) | 69.12(41) | 69.32(42) | 66.74(47) | 68.46(40) | 66.82(45) | 67.69(30) | 66.78(38) | 66.15(30) | 69.86(43) | 67.30(36) | 66.59(40) |           |
| Al <sub>2</sub> O <sub>3</sub>                          | 11.36(18) | 11.45(22)  | 11.98(25)  | 11.66 (22) | 11.92 (27) | 11.13(11) | 11.07(21) | 11.90(22) | 11.13(25) | 11.64(27) | 13.70(30) | 12.64(28) | 11.98(32) | 12.80(27) | 12.13(15) | 12.46(10) | 13.54(12) | 12.18(17) | 12.67(31) |           |
| <sup>a</sup> Fe <sub>2</sub> O <sub>3</sub>             | -         | -          | -          | -          | -          | -         | 0.06 (7)  | 0.11(5)   | -         | 0.14(5)   | 0.27(5)   | 0.25(3)   | 0.48(6)   | -         | 0.11(5)   | 0.40 (5)  | 0.15(6)   | 0.08(2)   | -         |           |
| MgO                                                     | 0.17(6)   | 0.05(2)    | 0.25(8)    | 0.16(5)    | 0.20(2)    | 0.16(6)   | 0.09(7)   | -         | 0.13(7)   | 0.13(10)  | 1.71(3)   | 1.86(5)   | 1.52(10)  | 1.49(11)  | 1.63 (15) | 1.18(18)  | 1.38(21)  | 0.91(7)   | 1.39(10)  |           |
| CaO                                                     | 2.36(10)  | 2.41(12)   | 2.61(15)   | 2.45(10)   | 2.44(9)    | 2.31(9)   | 2.78 (8)  | 3.01(7)   | 3.24(15)  | 3.23 (20) | 4.11(20)  | 3.55(15)  | 3.76 (18) | 3.71(18)  | 3.17(15)  | 2.56(1)   | 2.57(3)   | 2.54(11)  | 2.65(16)  |           |
| Na <sub>2</sub> O                                       | 1.54(9)   | 1.78(14)   | 1.66(12)   | 1.91(15)   | 1.71 (11)  | 1.61(10)  | 1.65(17)  | 1.35(19)  | 2.78(10)  | 2.67(21)  | 0.79(10)  | 0.84(15)  | 0.84(10)  | 0.92(12)  | 0.73(8)   | 1.20(10)  | 1.18 (11) | 1.20(5)   | 1.18 (6)  |           |
| K <sub>2</sub> O                                        | 4.48(8)   | 3.83(5)    | 4.47(12)   | 3.69(10)   | 4.08(7)    | 3.68 (5)  | 2.85(10)  | 2.72(9)   | 0.48(20)  | 0.43(8)   | 0.65 (19) | 0.53(15)  | 0.37(8)   | 0.43(10)  | 0.07(2)   | 2.20(10)  | 2.69(15)  | 2.36(8)   | 2.29(2)   |           |
| Tot.                                                    | 88.45     | 88.43      | 89.78      | 89.20      | 89.87      | 88.03     | 85.36     | 86.42     | 86.90     | 87.55     | 87.97     | 88.13     | 85.77     | 87.04     | 85.02     | 86.15     | 91.37     | 86.56     | 86.77     |           |
| <i>Number of cations on the basis of 96 framework O</i> |           |            |            |            |            |           |           |           |           |           |           |           |           |           |           |           |           |           |           |           |
| Si                                                      | 39.89     | 39.88      | 39.60      | 40.01      | 39.84      | 40.13     | 40.10     | 40.19     | 40.31     | 40.11     | 38.56     | 39.29     | 39.43     | 39.30     | 39.58     | 39.33     | 39.11     | 39.65     | 39.19     |           |
| Al                                                      | 7.79      | 7.81       | 8.13       | 7.90       | 8.07       | 7.65      | 7.82      | 7.87      | 7.65      | 7.94      | 9.33      | 8.55      | 8.33      | 8.76      | 8.37      | 8.73      | 8.93      | 8.45      | 8.79      |           |
| Fe <sup>3+</sup>                                        | -         | -          | -          | -          | -          | -         | 0.03      | 0.05      | -         | 0.06      | 0.12      | 0.11      | 0.21      | -         | 0.05      | 0.02      | 0.06      | 0.04      | -         |           |
| Mg                                                      | 0.15      | 0.04       | 0.21       | 0.14       | 0.71       | 0.14      | 0.08      | -         | 0.12      | 0.11      | 1.47      | 1.59      | 1.33      | 1.29      | 1.44      | 1.05      | 1.15      | 0.80      | 1.22      |           |
| Ca                                                      | 1.46      | 1.49       | 1.60       | 1.51       | 1.50       | 1.44      | 1.78      | 1.91      | 2.02      | 2.00      | 2.54      | 2.17      | 2.36      | 2.30      | 2.00      | 1.62      | 1.53      | 1.60      | 1.66      |           |
| Na                                                      | 1.74      | 2.00       | 1.85       | 2.13       | 1.90       | 1.82      | 1.93      | 1.56      | 3.14      | 2.99      | 0.88      | 0.94      | 0.96      | 1.04      | 0.84      | 1.38      | 1.28      | 1.37      | 1.35      |           |
| K                                                       | 3.33      | 2.83       | 3.28       | 2.71       | 2.99       | 2.73      | 2.18      | 2.07      | 0.36      | 0.31      | 0.48      | 0.39      | 0.28      | 0.32      | 0.35      | 1.67      | 1.92      | 1.77      | 1.72      |           |

|              |       |       |       |       |       |       |       |       |       |       |       |       |       |       |       |       |       |       |       |
|--------------|-------|-------|-------|-------|-------|-------|-------|-------|-------|-------|-------|-------|-------|-------|-------|-------|-------|-------|-------|
| <b>ΣT</b>    | 47.68 | 47.69 | 47.73 | 47.91 | 47.91 | 47.78 | 47.95 | 48.18 | 47.96 | 48.11 | 48.01 | 47.95 | 47.97 | 48.06 | 48.10 | 48.08 | 48.10 | 48.15 | 47.98 |
| <b>Si/Al</b> | 5.12  | 5.10  | 4.87  | 5.04  | 4.93  | 5.27  | 5.12  | 5.10  | 5.27  | 5.05  | 4.13  | 4.59  | 4.73  | 4.49  | 4.67  | 5.02  | 5.12  | 4.67  | 4.60  |
| <b>TE%</b>   | -3.02 | 3.48  | -5.86 | -2.70 | -1.94 | -0.79 | 0.28  | 5.75  | -1.60 | 5.90  | 0.70  | -2.23 | -1.19 | 2.63  | 5.16  | 6.55  | 5.39  | 6.60  | -0.49 |

Notes: The data are the mean of then point analyses, standard deviations are given in parentheses. "s" is shards, "c" is cavities and "m" is matrix. <sup>α</sup> Total Fe as Fe<sub>2</sub>O<sub>3</sub>; <sup>β</sup> water was calculated by difference; <sup>γ</sup> E(%) by [69].
